# Supplementary material for: Plant pan-genomes are highly vulnerable to methodological considerations
Source: Research Square preprint supplement (doi:10.21203/rs.3.rs-1415605/v1), 2022-03-10
Supplement: Supplementary file 1 [file 29fae86738324baad8ac9dc5.xlsx]

## Sheet: Table S1
Table S1: Accessions used for pan-genome construction
A. thaliana
Accession name	SRA/ENA ID	High qualitygenome
Col-0 (Reference)	-	https://plants.ensembl.org/Arabidopsis_thaliana/Info/Index
Eri	ERR3624573	https://1001genomes.org/data/MPIPZ/MPIPZJiao2020/releases/current/full_set/
Kyo	ERR3624576
Cvi-0	ERR3624578
Ler	ERR3624574
Sha	ERR3624575
C24	ERR3624577
An-1	ERR3624579
Soybean
Accession name	GSA ID	High qualitygenome
Wm82 (Reference)	-	https://www.soybase.org/GlycineBlastPages/blast_descriptions.php
Dong-Nong-No.50	CRR109646	ftp://download.big.ac.cn/gwh/Plants/Glycine_max_SoyC12_asm_GWHACEV00000000/GWHACEV00000000.genome.fasta.gz
Han-Dou-No.5	CRR109642	ftp://download.big.ac.cn/gwh/Plants/Glycine_max_SoyC09_asm_GWHACES00000000/GWHACES00000000.genome.fasta.gz
Hei-He-No.43	CRR109647	ftp://download.big.ac.cn/gwh/Plants/Glycine_max_SoyC13_asm_GWHACEW00000000/GWHACEW00000000.genome.fasta.gz
Jin-Dou-No.23	CRR109640	ftp://download.big.ac.cn/gwh/Plants/Glycine_max_SoyC07_asm_GWHACEQ00000000/GWHACEQ00000000.genome.fasta.gz
Ju-Xuan-No.23	CRR109634	ftp://download.big.ac.cn/gwh/Plants/Glycine_max_SoyC03_asm_GWHACEM00000000/GWHACEM00000000.genome.fasta.gz
Qi-Huang-No.34	CRR109641	ftp://download.big.ac.cn/gwh/Plants/Glycine_max_SoyC08_asm_GWHACER00000000/GWHACER00000000.genome.fasta.gz
Yu-Dou-No.22	CRR109639	ftp://download.big.ac.cn/gwh/Plants/Glycine_max_SoyC06_asm_GWHACEP00000000/GWHACEP00000000.genome.fasta.gz

## Sheet: Table S2
Table S2: A. thaliana pan-genome - gene content per accession
	An-1		C24		Cvi-0		Eri		Kyo		Ler		Sha		Col-0
	De novo	Map-to-pan	De novo	Map-to-pan	De novo	Map-to-pan	De novo	Map-to-pan	De novo	Map-to-pan	De novo	Map-to-pan	De novo	Map-to-pan	De novo	Map-to-pan
Reference	25484	26704	25399	26661	25263	26538	25418	26701	25444	26723	25441	26713	25425	26591	27295	27295
Nonreference	2271	250	2234	308	2096	306	2162	255	2032	274	2080	285	2101	300	0	0
Core	23426	25657	23426	25657	23426	25657	23426	25657	23426	25657	23426	25657	23426	25657	23426	25657
Shell	4167	1267	4041	1287	3696	1124	3986	1291	3884	1316	3965	1323	3943	1205	3272	1575
Singleton	162	30	166	25	237	63	168	8	166	24	130	18	157	29	597	63

## Sheet: Table S3
Table S3: Pan-genomes constructed in this study
Name	Organism	Construction approach	Sequencing depth	Use pre-assembled genomes	Annotation evidence set
At_DN_x10	A. taliana	De-novo	10	No	Standard
At_DN_x20	A. taliana	De-novo	20	No	Standard
At_DN_x30	A. taliana	De-novo	30	No	Standard
At_DN_x50	A. taliana	De-novo	50	No	Standard
At_DN_full-data	A. taliana	De-novo	70-90	No	Standard
At_DN_HQ_asm	A. taliana	De-novo	-	Yes	Standard
At_MTP_x10	A. taliana	Map-to-pan	10	No	Standard
At_MTP_x20	A. taliana	Map-to-pan	20	No	Standard
At_MTP_x30	A. taliana	Map-to-pan	30	No	Standard
At_MTP_x50	A. taliana	Map-to-pan	50	No	Standard
At_MTP_full-data	A. taliana	Map-to-pan	70-90	No	Standard
At_MTP_HQ_asm	A. taliana	Map-to-pan	-	Yes	Standard
At_DN_x50_no_ev	A. taliana	De-novo	50	No	None
At_DN_x50_HQ_ev	A. taliana	De-novo	50	No	High quality
At_MTP_x50_no_ev	A. taliana	Map-to-pan	50	No	None
At_MTP_x50_HQ_ev	A. taliana	Map-to-pan	50	No	High quality
Gm_DN_x20	G. max	De-novo	20	No	Standard
Gm_DN_x50	G. max	De-novo	50	No	Standard
Gm_DN_HQ_asm	G. max	De-novo	-	Yes	Standard
Gm_MTP_x20	G. max	Map-to-pan	20	No	Standard
Gm_MTP_x50	G. max	Map-to-pan	50	No	Standard
Gm_MTP_HQ_asm	G. max	Map-to-pan	-	Yes	Standard

## Sheet: Table S4
Table S4: De novo genome assembly statistics
	x10						x20						x30						x50						full-data
	Input bases	# contigs	Total length	N50	% Complete BUSCOs	% unmapped (Chr0)	Input bases	# contigs	Total length	N50	% Complete BUSCOs	% unmapped (Chr0)	Input bases	# contigs	Total length	N50	% Complete BUSCOs	% unmapped (Chr0)	Input bases	# contigs	Total length	N50	% Complete BUSCOs	% unmapped (Chr0)	Input bases	# contigs	Total length	N50	% Complete BUSCOs	% unmapped (Chr0)
Eri	1199999988	58279	93724570	2346	75.7	4.78717	2399999976	20128	108079498	15789	97.6	4.49374	3599999964	31078	108656224	7348	98.1	4.47679	5999999940	11640	111057643	52903	99	4.40442	7572904654	10622	111377769	57658	99.1	4.21389
Kyo	1199999988	71823	88432799	1741	62.4	4.85365	2399999976	26275	106799992	9548	96.8	4.49669	3599999964	31954	107958387	7006	98	4.4861	5999999940	11900	110290354	49544	99.1	4.03393	8497740848	10662	110753407	57032	99.1	4.03031
Cvi-0	1199999988	63574	88657390	1981	75.2	5.02637	2399999976	14558	105268709	15869	98.4	3.63726	3599999964	13907	109302409	37140	99	4.2799	5999999940	11522	110573056	52262	99.1	4.23756	11140236168	10739	111470718	58812	99	4.36763
Ler	1199999988	64130	98425685	2305	83.5	7.12389	2399999976	30203	116283845	19693	98.8	12.1567	3599999964	55099	132406918	36811	99.2	21.6394	5999999940	114937	168248290	35983	99.3	38.6615	9702204026	210122	241010211	8823	99.3	57.3181
Sha	1199999988	54681	94742152	2593	79.4	4.74803	2399999976	17238	108127539	20538	98.8	4.51851	3599999964	12990	109363073	40931	99	4.30739	5999999940	10787	110447575	54991	99.1	4.26517	10154827244	10136	110877536	59224	99.1	4.17778
C24	1199999988	37218	100323283	4225	93.8	4.27097	2399999976	27794	108437700	8757	97.8	4.44367	3599999964	12429	110521534	50475	99	4.3829	5999999940	10822	111611443	58597	99	4.59297	7583700140	10667	111853270	61672	99	4.65824
An-1	1199999988	40065	100279616	3863	93.8	4.14634	2399999976	30170	108723298	7665	97.7	4.55175	3599999964	12631	110727828	46494	99.2	4.33843	5999999940	11384	111901368	57745	99.1	4.59403	10586509324	12178	112909323	62078	99.1	5.21637

## Sheet: Table S5
Table S5: The effect of assembly quality on pan-genome size and composition
	De novo				Map-to-pan
	Core	Shell	Singletons	Total	Core	Shell	Singletons	Total
x10	12679	16886	5445	35010	22730	4702	325	27757
x20	21783	7851	2730	32364	25427	2174	241	27842
x30	22848	6937	2026	31811	25577	2081	263	27921
x50	23426	6651	1783	31860	25657	2041	260	27958
full_data	23583	6381	1944	31908	25716	1988	259	27963
HQ-assembly	23788	6943	1763	32494	25715	2058	274	28047

## Sheet: Table S6
Table S6: Gene counts across A. thaliana ecotypes and pan-genomes
	De novo						Map-to-pan
	x10	x20	x30	x50	full_data	HQ-assembly	x10	x20	x30	x50	full_data	HQ-assembly
An-1	25816	27124	27562	27755	27731	28287	26515	26818	26911	26954	26987	27029
C24	25835	27027	27483	27633	27718	28113	26476	26801	26894	26969	26978	27029
Cvi-0	23218	26700	27197	27359	27481	27936	25684	26663	26784	26844	26886	26948
Eri	23888	26898	27029	27580	27651	28320	25812	26785	26891	26956	26978	27049
Kyo	22298	26633	26875	27476	27497	28437	24953	26784	26900	26997	27005	27086
Ler	24491	26958	27344	27521	27696	28164	26382	26841	26940	26998	27027	27082
Sha	24347	26936	27172	27526	27541	27877	26156	26742	26836	26891	26952	27029
TAIR10	27295	27295	27295	27295	27295	27295	27295	27295	27295	27295	27295	27295

## Sheet: Table S7
Table S7: Nonreference gene pools of A. thaliana pan-genomes
	De novo				Map-to-pan
	Matched	PG+|HQ-	PG-|HQ+	Total	Matched	PG+|HQ-	PG-|HQ+	Total
x10	643	7072	4556	12271	91	371	661	1123
x20	1515	3554	3684	8753	230	317	522	1069
x30	1923	2593	3276	7792	278	348	474	1100
x50	2222	2343	2977	7542	326	337	426	1089
full_data	2363	2250	2836	7449	346	322	406	1074
HQ-assembly				5199				753

## Sheet: Table S8
Table S8: Gene PAV discrepancies between A. thaliana pan-genomes and the HQ-assemblies pan-genome
	De novo					Map-to-pan
	PG-|HQ+	PG+|HQ-	Total discrepancies	Total PA calls	% Discrepancies	PG-|HQ+	PG+|HQ-	Total discrepancies	Total PA calls	% Discrepancies
x10	27554	3495	31049	124352	24.9686	6094	47	6141	37344	16.4444
x20	8007	3243	11250	58968	19.0781	1080	39	1119	16856	6.63859
x30	5811	3157	8968	53992	16.6099	623	62	685	16120	4.24938
x50	6209	4234	10443	51712	20.1945	302	81	383	15816	2.4216
full data	4134	2844	6978	51664	13.5065	100	113	213	15584	1.36679

## Sheet: Table S9
Table S9: A. thaliana pan-genome compositions using difference annotation evidence
	De novo								Map-to-pan
	Reference	Nonreference	Core	Shell	Singletons	Total	Reference	Nonreference	Core	Shell	Singletons	Total
No-evidence	27295	11457	23502	11503	3747	38752	26977	6813	25657	5237	2896	33790
General evidence	27295	4565	23426	6651	1783	31860	27289	669	25657	2041	260	27958
HQ evidence	27295	3546	23582	5633	1626	30841	27292	1777	25657	2791	621	29069

## Sheet: Table S10
Table S10: Compositions of soybean pan-genomes constructed using the De novo and Map-to-pan approaches
	De novo	Map-to-pan
Total pan-genes	70898	52058
Reference pan-genes	51769	51769
Non-reference pan-genes	19129	289
Core pan-genes	38618	51027
Shell pan-genes	24197	953
Singletons	8083	77

[truncated: 6 more sheets: Table S11, Table S12, Table S13, Table S14, Table S15, Table S16]
